# Supplementary material for: Carbon nitride mediated strong metal–support interactions in a Au/TiO2 catalyst for aerobic oxidative desulfurization
Source: Royal Society of Chemistry journal article supplement (doi:10.1039/c9qi01195a), 2020-01-01
Supplement: c9qi01195a1.pdf [file c9qi01195a1.pdf]

## Carbon Nitride Mediated Strong Metal-Support Interaction in Au/TiO<sub>2</sub> Catalyst for Aerobic Oxidative Desulfurization

Mingyang Liu <sup>a</sup>, Jing He <sup>a</sup>, Peiwen Wu <sup>a</sup>, Linjie Lu <sup>a</sup>, Chao Wang <sup>b</sup>, Linlin Chen <sup>a</sup>,  
Mingqing Hua <sup>a</sup>, Wenshuai Zhu, \*,<sup>a</sup> and Huaming Li <sup>a</sup>

<sup>a</sup> School of Chemistry and Chemical Engineering, Institute for Energy Research  
Jiangsu University, Zhenjiang, Jiangsu, 212013, P. R. China

<sup>b</sup> School of Environment and Safety Engineering, Jiangsu University, Zhenjiang,  
Jiangsu, 212013, P. R. China

\* E-mail: zhuws@ujs.edu.cn

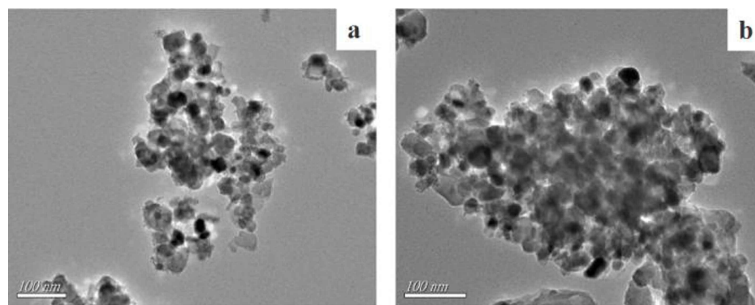

Figure S1. TEM images of catalysts (a) Au-TiO<sub>2</sub>@C<sub>3</sub>N<sub>4</sub> (b) Au-TiO<sub>2</sub>

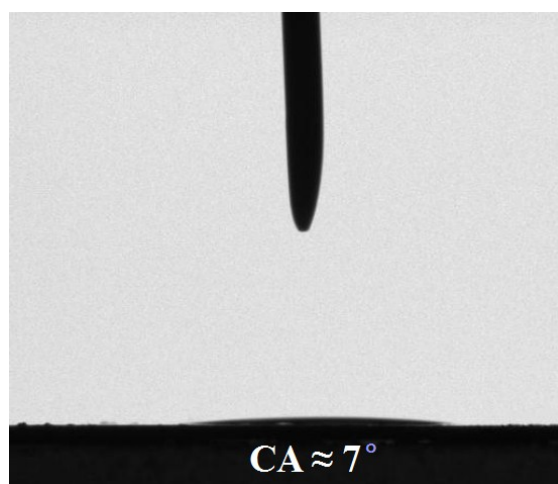

Figure S2. Contact angle for an oil droplet on the surface of Au-TiO<sub>2</sub>

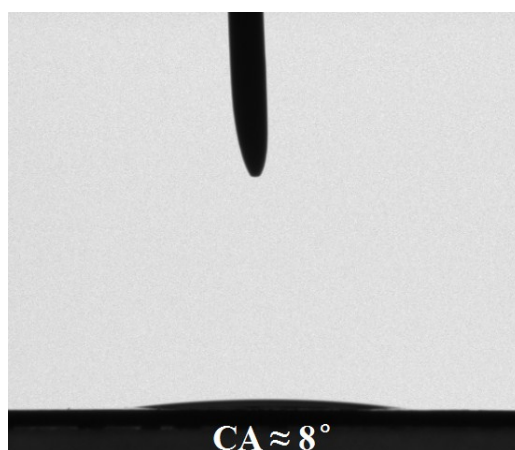

Figure S3. Contact angle for an oil droplet on the surface of Au-TiO<sub>2</sub>@C<sub>3</sub>N<sub>4</sub>

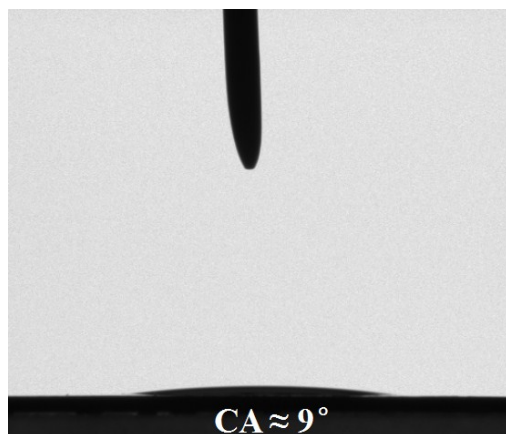

Figure S4. Contact angle for an oil droplet on the surface of Au-TiO<sub>2</sub>-800

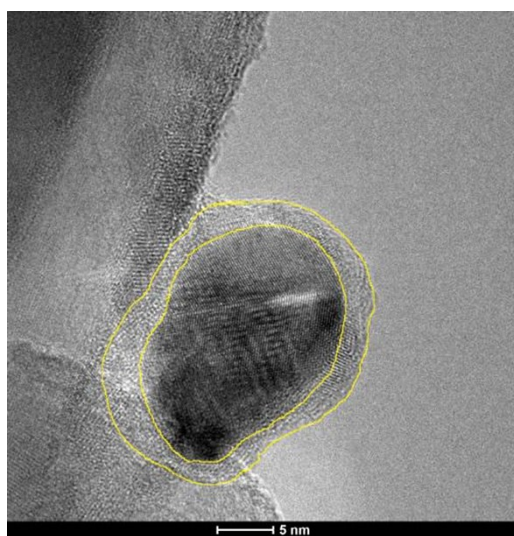

Figure S5. HRTEM image of Au-TiO<sub>2</sub>@C<sub>3</sub>N<sub>4</sub> catalyst

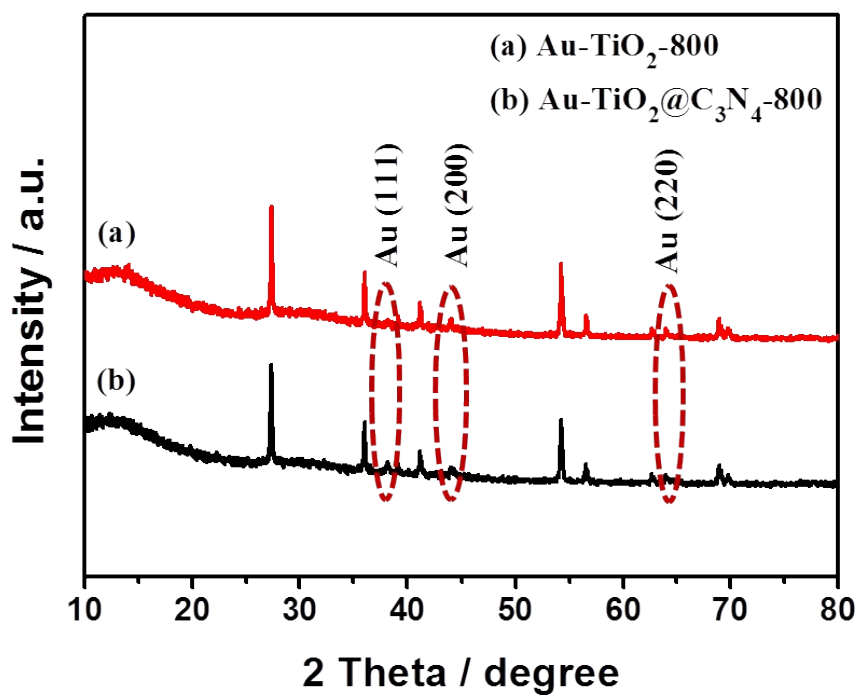

Figure S6. XRD patterns of (a) Au-TiO<sub>2</sub>-800 (b) Au-TiO<sub>2</sub>@C<sub>3</sub>N<sub>4</sub>-800

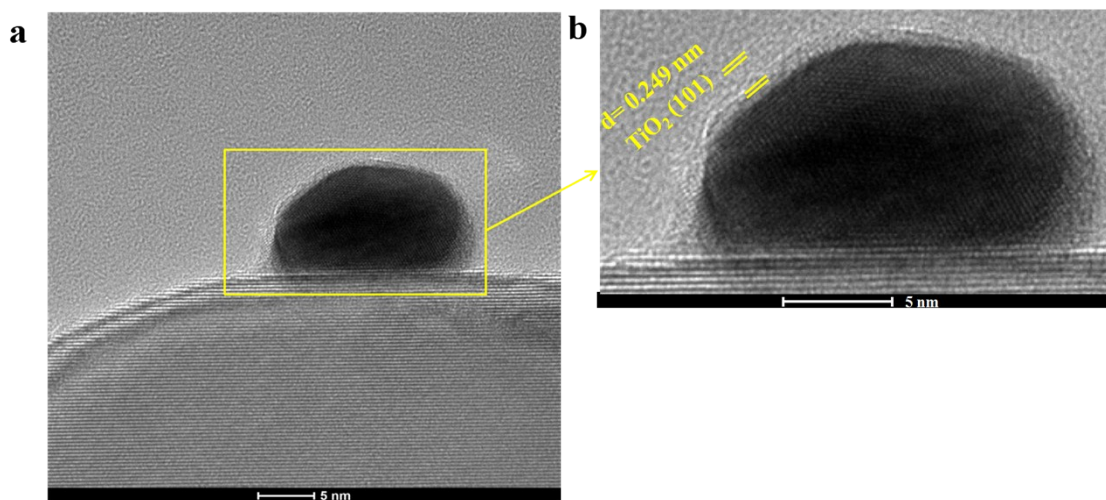

Figure S7. HRTEM images of Au-TiO<sub>2</sub>@C<sub>3</sub>N<sub>4</sub>-800.

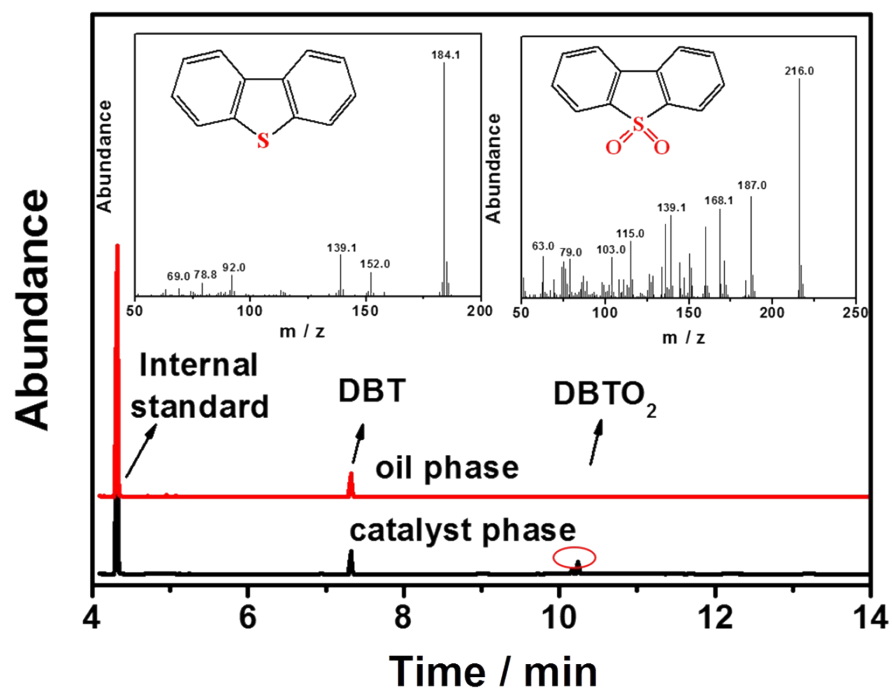

Figure S8. GC-MS analysis of oil phase and catalyst phase during the reaction
